# Supplementary material for: A wearable motion capture device able to detect dynamic motion of human limbs
Source: PubMed Central journal article supplement (PMC7645594; doi:10.1038/s41467-020-19424-2), 2020-11-05
Supplement: 41467_2020_19424_MOESM5_ESM.pdf [file 41467_2020_19424_MOESM5_ESM.pdf]

**Title:** Supplementary Movie 1

**Description:** Boxing motion capture of forearm wearing our device.

**Title:** Supplementary Movie 2

**Description:** Kicking motion capture of shank wearing our device.

**Title:** Supplementary Movie 3

**Description:** Motion capture of lower limb by wearing our device on the shank.
